# Supplementary material
Source: PubMed Central journal article supplement (PMC1276087)
Supplement: pnas_0507611102_2.pdf [file pnas_0507611102_2.pdf]

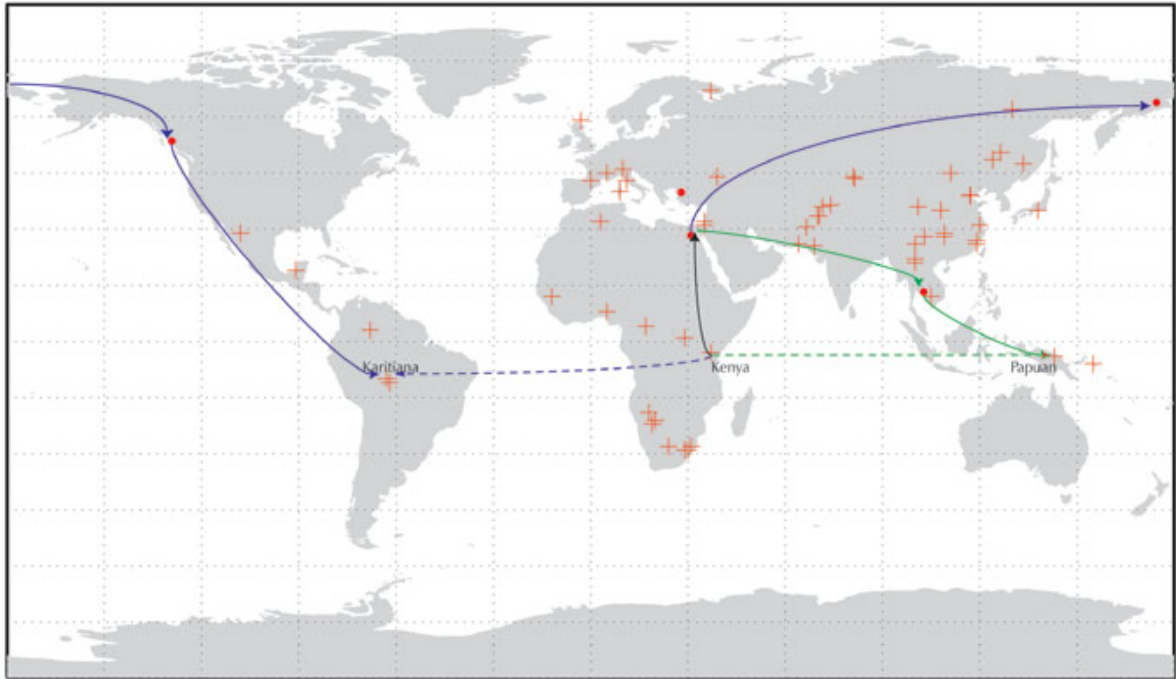

**Fig. 6.** A map of samples with added waypoints used in this analysis, adapted from supplemental figure 1 of Cann *et al.* (1). Red crosses indicate geographic locations of populations sampled for the Human Genome Diversity Panel. Red dots are waypoints for the following locations: Anadyr (Russia), Cairo (Egypt), Istanbul (Turkey), Phnom Penh (Cambodia), and Prince Rupert (Canada). Dashed arrows show a schematic of how a great circle distance would be calculated between the Kenyan Bantu and either the Karitiana or the Papuans. Filled arrows show how paths change when using waypoints; for example, the path from Kenya to the Karitiana first goes through Cairo, then Anadyr and Prince Rupert, entering America via the Bering Strait and moving down the western coast.

1. Cann, H. M., de Toma, C., Cazes, L., Legrand, M. F., Morel, V., Piouffre, L., Bodmer, J., Bodmer, W. F., Bonne-Tamir, B., Cambon-Thomasen, A., *et al.* (2002) *Science* **296**, 261–262.
