# Supplementary material
Source: PubMed Central journal article supplement (PMC1276087)
Supplement: pnas_0507611102_3.pdf [file pnas_0507611102_3.pdf]

**Table 2. Populations ranked in descending order of their influence on the linear regression of genetic distance on geographic distance**

| <b>Rank</b> | <b>Population</b>  | <b>Influence (<math>\times 10^{-3}</math>)</b> | <b><math>R^2</math> elim.</b> |
|-------------|--------------------|------------------------------------------------|-------------------------------|
| 1           | Karitiana          | -7.010                                         | 0.7446                        |
| 2           | Maya               | 4.515                                          | 0.8183                        |
| 3           | Pima               | -2.545                                         | 0.7856                        |
| 4           | Colombian          | 1.870                                          | 0.7711                        |
| 5           | Kalash             | -1.187                                         | 0.8001                        |
| 6           | San                | -1.080                                         | 0.7858                        |
| 7           | Mbuti Pygmy        | -1.061                                         | 0.796                         |
| 8           | Lahu               | -0.607                                         | 0.7878                        |
| 9           | Southeastern Bantu | 0.539                                          | 0.7823                        |
| 10          | Biaka Pygmy        | -0.533                                         | 0.7861                        |
| 11          | French             | 0.438                                          | 0.7856                        |
| 12          | Mandenka           | 0.372                                          | 0.7836                        |
| 13          | Tuscan             | 0.351                                          | 0.7836                        |
| 14          | Mozabite           | 0.325                                          | 0.7859                        |
| 15          | Uyгур              | 0.321                                          | 0.7810                        |
| 16          | Mongola            | 0.316                                          | 0.7813                        |
| 17          | Japanese           | 0.307                                          | 0.7828                        |
| 18          | Italian            | 0.288                                          | 0.7832                        |
| 19          | Hazara             | 0.257                                          | 0.7829                        |
| 20          | Cambodian          | 0.256                                          | 0.7843                        |
| 21          | Daur               | 0.252                                          | 0.7816                        |
| 22          | Orcadian           | 0.245                                          | 0.7840                        |
| 23          | Hezhen             | 0.234                                          | 0.7823                        |
| 24          | Han (N. China)     | 0.218                                          | 0.7807                        |
| 25          | Naxi               | -0.217                                         | 0.7831                        |
| 26          | Russian            | 0.217                                          | 0.7819                        |

| <b>Rank</b> | <b>Population</b>  | <b>Influence (<math>\times 10^{-3}</math>)</b> | <b><math>R^2</math> elim.</b> |
|-------------|--------------------|------------------------------------------------|-------------------------------|
| 27          | Basque             | 0.185                                          | 0.7839                        |
| 28          | Sindhi             | 0.182                                          | 0.7837                        |
| 29          | Makrani            | 0.169                                          | 0.7831                        |
| 30          | Han                | 0.165                                          | 0.7807                        |
| 31          | Adygei             | 0.162                                          | 0.7815                        |
| 32          | Sardinian          | 0.158                                          | 0.7830                        |
| 33          | Druze              | -0.157                                         | 0.7846                        |
| 34          | Melanesian         | 0.156                                          | 0.7803                        |
| 35          | Pathan             | 0.117                                          | 0.7830                        |
| 36          | Tu                 | 0.100                                          | 0.7809                        |
| 37          | Bantu (Kenya)      | 0.095                                          | 0.7825                        |
| 38          | Papuan             | -0.088                                         | 0.7858                        |
| 39          | Yi                 | 0.086                                          | 0.7815                        |
| 40          | Palestinian        | 0.086                                          | 0.7833                        |
| 41          | Tujia              | 0.073                                          | 0.7811                        |
| 42          | Yoruba             | -0.063                                         | 0.7825                        |
| 43          | Burusho            | 0.059                                          | 0.7825                        |
| 44          | Brahui             | -0.053                                         | 0.7835                        |
| 45          | Yakut              | -0.050                                         | 0.7826                        |
| 46          | Xibo               | 0.047                                          | 0.7833                        |
| 47          | Oroqen             | -0.037                                         | 0.7816                        |
| 48          | Bedouin            | 0.033                                          | 0.7833                        |
| 49          | Balochi            | 0.032                                          | 0.7832                        |
| 50          | Dai                | -0.020                                         | 0.7825                        |
| 51          | She                | -0.008                                         | 0.7815                        |
| 52          | Miao               | 0.007                                          | 0.7814                        |
| 53          | Southwestern Bantu | 0.003                                          | 0.7793                        |

Influence on the regression is measured as the average difference between residuals (*i*)

in a regression fitted after a population is the deleted from the dataset and (ii) in the original regression using the worldwide data. Populations are ranked here in descending order of the absolute value of this average difference in residuals.  $R^2$  elim. is the value of  $R^2$  for the linear regression when the population is eliminated from the data set under analysis. Note that  $R^2$  for the worldwide regression is 0.7833.
